# Supplementary figures and images for: Characterization of the Chloroplast Genome Structure of Gueldenstaedtia verna (Papilionoideae) and Comparative Analyses among IRLC Species
Source: MDPI journal article supplement (doi:10.3390/f13111942), 2022-11-17

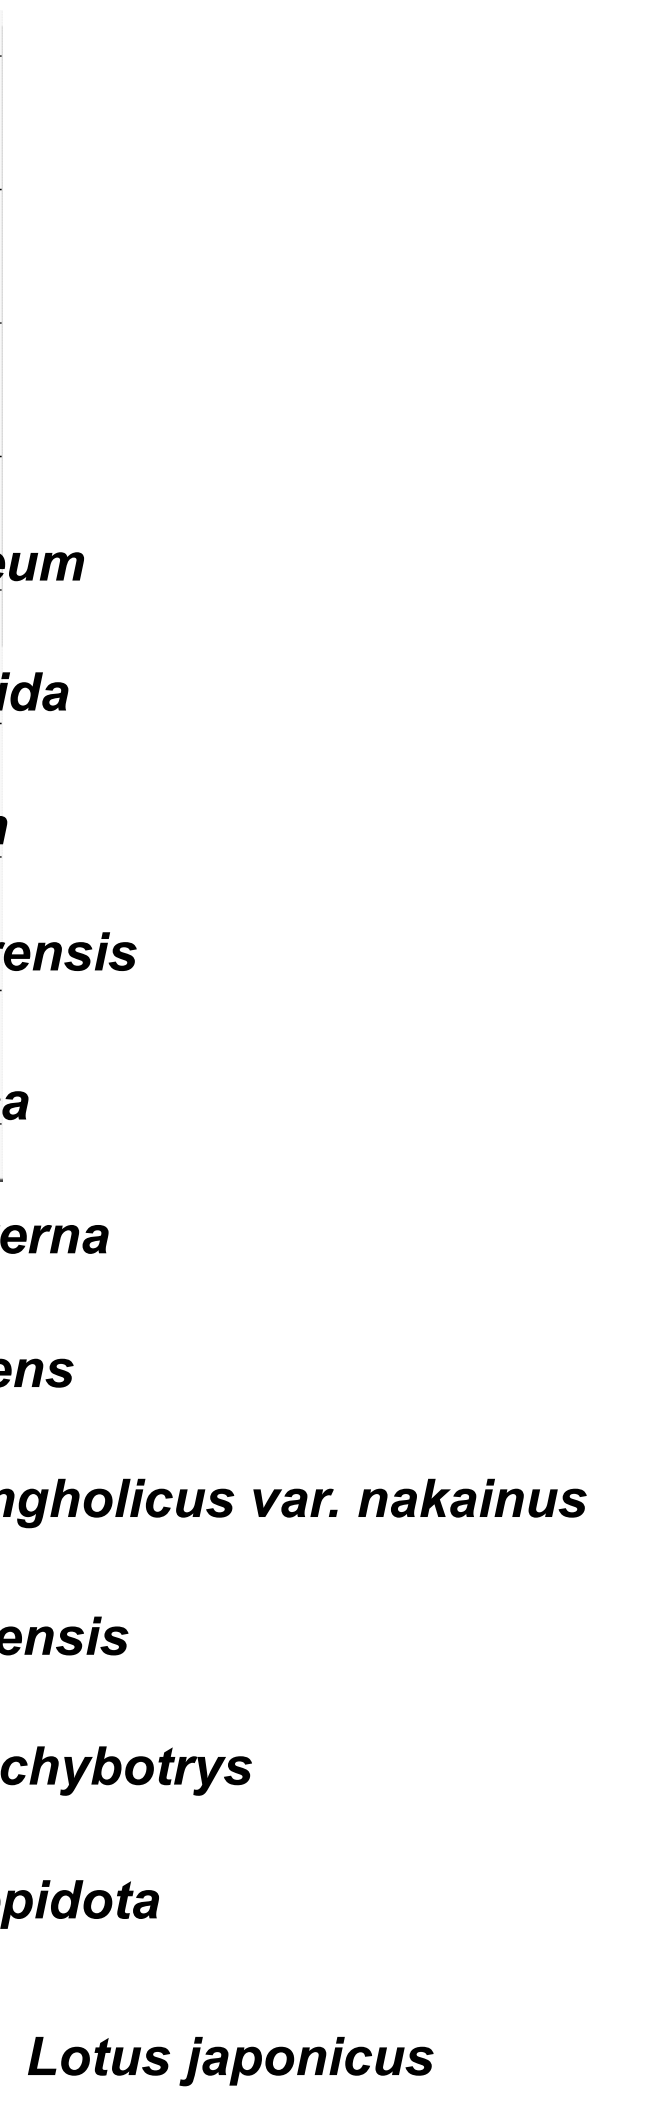

Supplement: s1 [file s1]

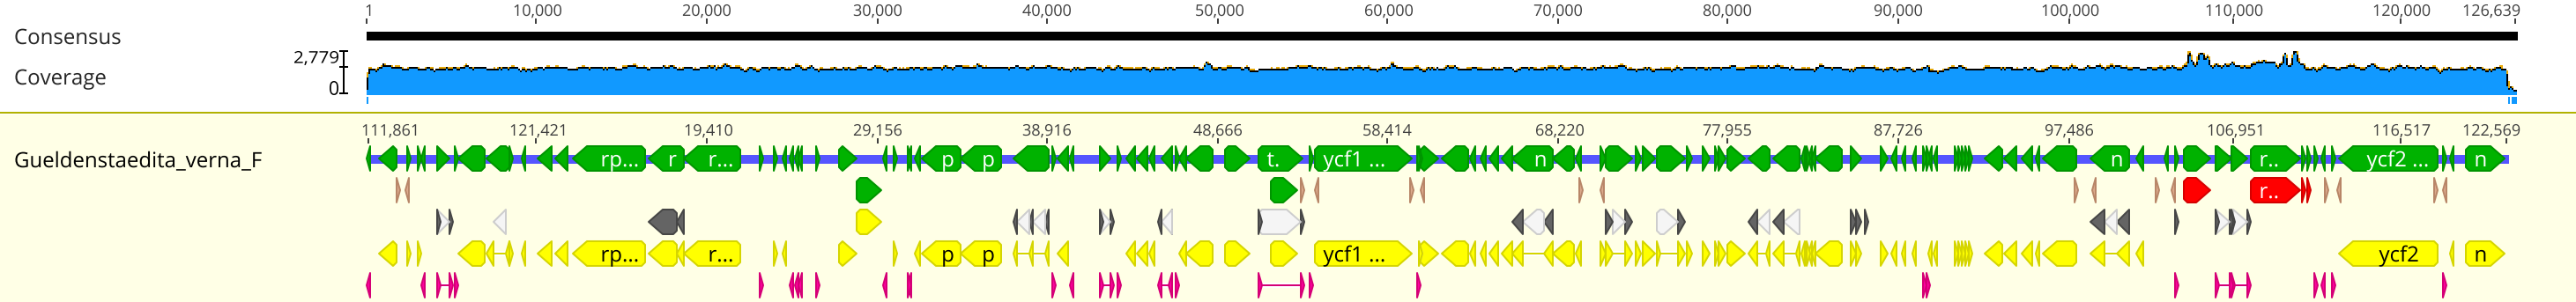

Supplement: s1 [file s1]
